# Supplementary material for: E. coli aggregation and impaired cell division after terahertz irradiation
Source: PubMed Central journal article supplement (PMC8516962; doi:10.1038/s41598-021-99665-3), 2021-10-14
Supplement: 41598_2021_99665_MOESM1_ESM.pdf [file 41598_2021_99665_MOESM1_ESM.pdf]

**Supplementary Table S1** Functional enrichment data on the set of *E. coli* genes upregulated by the THz irradiation, with relations identified via the STRING Web service.

| pathway ID                | description                                       | false discovery rate | matching proteins in network (labels)                                                                                                          |
|---------------------------|---------------------------------------------------|----------------------|------------------------------------------------------------------------------------------------------------------------------------------------|
| <b>Biological Process</b> |                                                   |                      |                                                                                                                                                |
| GO.0043711                | pilus organization                                | 4.63E-09             | elfC, elfD, htrE, sfmC, sfmD, yadV, ybgP, ybgQ, yehB, yehC, yfcS, yhcA, yhcD, yqiH, yraI, yraJ                                                 |
| GO.0007155                | cell adhesion                                     | 2.49E-07             | csgA, csgB, elfA, pgaC, sfmA, sfmF, sfmH, yadC, yadK, yadL, yadM, yadN, ybgD, ybgO, ydeQ, ydeR, yfcQ, yfcR, yfcV, yqiI, yraH                   |
| GO.0015628                | protein secretion by the type II secretion system | 3.75E-06             | gspC, gspD, gspE, gspF, gspG, gspH, gspI, gspJ                                                                                                 |
| GO.0030030                | cell projection organization                      | 7.24E-05             | elfC, elfD, fliP, fliR, htrE, sfmC, sfmD, yadV, ybgP, ybgQ, yehB, yehC, yfcS, yhcA, yhcD, yqiH, yraI, yraJ                                     |
| GO.0009297                | pilus assembly                                    | 0.00665              | elfC, htrE, sfmD, ybgQ, yehB, yhcD, yraJ                                                                                                       |
| GO.0009306                | protein secretion                                 | 0.00938              | fliP, gspC, gspD, gspE, gspF, gspG, gspH, gspI, gspJ, gspK                                                                                     |
| <b>Molecular Function</b> |                                                   |                      |                                                                                                                                                |
| GO.0015288                | porin activity                                    | 1.29E-06             | bglH, elfC, htrE, nanC, ompG, ompL, ompN, phoE, sfmD, uidC, wza, ybgQ, yehB, yhcD, yraJ                                                        |
| GO.0044183                | protein binding involved in protein folding       | 0.00023              | elfD, sfmC, yadV, ybgP, yehC, yfcS, yhcA, yqiH, yraI                                                                                           |
| GO.0015473                | fimbrial usher porin activity                     | 0.000285             | elfC, htrE, sfmD, ybgQ, yehB, yhcD, yraJ                                                                                                       |
| <b>Cellular Component</b> |                                                   |                      |                                                                                                                                                |
| GO.0009289                | pilus                                             | 3.52E-10             | csgA, csgB, elfA, sfmA, sfmF, sfmH, yadC, yadK, yadL, yadM, yadN, yadV, ybgD, ybgO, ydeQ, ydeR, yfcQ, yfcR, yfcV, yqiI, yraH                   |
| GO.0042995                | cell projection                                   | 4.44E-08             | csgA, csgB, elfA, fliE, fliP, fliR, sfmA, sfmF, sfmH, yadC, yadK, yadL, yadM, yadN, yadV, ybgD, ybgO, ydeQ, ydeR, yfcQ, yfcR, yfcV, yqiI, yraH |
| GO.0015627                | type II protein secretion system complex          | 5.15E-07             | gspC, gspD, gspE, gspF, gspG, gspH, gspI, gspJ                                                                                                 |
| GO.0046930                | pore complex                                      | 0.00129              | bglH, nanC, ompG, ompL, ompN, phoE, uidC, wza                                                                                                  |

**Supplementary Table S2** Functional enrichment with GO terms in the set of *E. coli* genes downregulated by the THz irradiation. The relations were identified using the STRING Web service.

| pathway ID                     | pathway description                            | false discovery rate | matching proteins in network (labels)                                                                                                                                                                                                                                  |
|--------------------------------|------------------------------------------------|----------------------|------------------------------------------------------------------------------------------------------------------------------------------------------------------------------------------------------------------------------------------------------------------------|
| <b>Cellular Component (GO)</b> |                                                |                      |                                                                                                                                                                                                                                                                        |
| GO.0044444                     | cytoplasmic part                               | 3.95e-15             | accB,accD,ansB,aspA,aspC,crr,deoD,fumA,gapA,glmM,glpA,glpK,glpA,katG,lpdA,lysU,maeB,nusA,ppiB,ptsH,ptsI,purA,raiA,rihC,rpiA,rplA,rplC,rplI,rplL,rplO,rplR,rplT,rpmC,rpmD,rpmE,rpmI,rpmJ,rpsA,rpsD,rpsE,rpsG,rpsH,rpsI,rpsJ,rpsK,rpsR,serS,skp,sodB,tnaA,tpiA,ubiC      |
| GO.0032991                     | macromolecular complex                         | 7.19e-14             | accB,accD,atpC,cydB,cyoA,cyoB,cyoC,cyoD,dppA,dppB,dppC,eno,glpA,hupA,nuoB,nuoE,nuoG,nuoH,nuoI,nuoJ,nuoL,nuoM,oppA,par,ptsH,ptsI,raiA,rplA,rplC,rplI,rplL,rplO,rplR,rplT,rpmC,rpmD,rpmE,rpmI,rpmJ,rpsA,rpsD,rpsE,rpsG,rpsH,rpsI,rpsJ,rpsK,rpsR,sdhA,sdhC,secE,xseB,yajC |
| GO.0005840                     | ribosome                                       | 1.45e-13             | raiA,rplA,rplC,rplI,rplL,rplO,rplR,rplT,rpmC,rpmD,rpmE,rpmI,rpmJ,rpsA,rpsD,rpsE,rpsG,rpsH,rpsI,rpsJ,rpsK,rpsR                                                                                                                                                          |
| GO.0070469                     | respiratory chain                              | 7.5e-12              | cyoA,cyoB,nuoB,nuoE,nuoG,nuoH,nuoI,nuoJ,nuoL,nuoM,sdhA,sdhC                                                                                                                                                                                                            |
| <b>Biological Process (GO)</b> |                                                |                      |                                                                                                                                                                                                                                                                        |
| GO.0006091                     | generation of precursor metabolites and energy | 1.33e-10             | aspA,cydB,cydX,cyoA,cyoB,cyoC,cyoD,eno,fda,frdA,fumA,gapA,gldA,glpC,glpA,gpmA,lpdA,nuoB,nuoE,nuoG,nuoH,nuoI,nuoL,nuoM,pflB,pgk,sdhA,sdhB,sdhC,sdhD,tpiA                                                                                                                |
| GO.0009060                     | aerobic respiration                            | 4.2e-09              | aspA,cydB,cyoA,cyoB,cyoC,cyoD,fumA,glpA,nuoB,nuoG,nuoH,nuoI,nuoM,sdhA,sdhB,sdhC,sdhD                                                                                                                                                                                   |
| GO.0006412                     | translation                                    | 3.15e-10             | asnA,ettA,fus,lysU,rplA,rplC,rplI,rplL,rplO,rplR,rplT,rpmC,rpmD,rpmE,rpmI,rpmJ,rpsA,rpsD,rpsE,rpsG,rpsH,rpsI,rpsJ,rpsK,rpsR,serS,tufA                                                                                                                                  |
| GO.0045333                     | cellular respiration                           | 5.78e-07             | aspA,cydB,cyoA,cyoB,cyoC,cyoD,frdA,fumA,glpA,nuoB,nuoE,nuoG,nuoH,nuoI,nuoL,nuoM,pflB,sdhA,sdhB,sdhC,sdhD                                                                                                                                                               |
| <b>Molecular Function (GO)</b> |                                                |                      |                                                                                                                                                                                                                                                                        |
| GO.0003735                     | structural constituent of ribosome             | 2.56e-11             | rplA,rplC,rplI,rplL,rplO,rplR,rplT,rpmC,rpmD,rpmE,rpmI,rpmJ,rpsA,rpsD,rpsE,rpsG,rpsH,rpsI,rpsJ,rpsK,rpsR                                                                                                                                                               |
| GO.0048038                     | quinone binding                                | 7.05e-07             | cyoA,cyoB,nuoB,nuoE,nuoG,nuoH,nuoI,nuoJ,nuoL,nuoM,sdhC                                                                                                                                                                                                                 |
| GO.0003723                     | RNA binding                                    | 8.94e-07             | accD,cspA,cspC,cspD,ettA,fus,nusA,rplA,rplC,rplI,rplO,rplR,rplT,rpmC,rpmE,rpsA,rpsD,rpsE,rpsG,rpsH,rpsI,rpsJ,rpsK,rpsR,rsuA,smpB,tufA                                                                                                                                  |

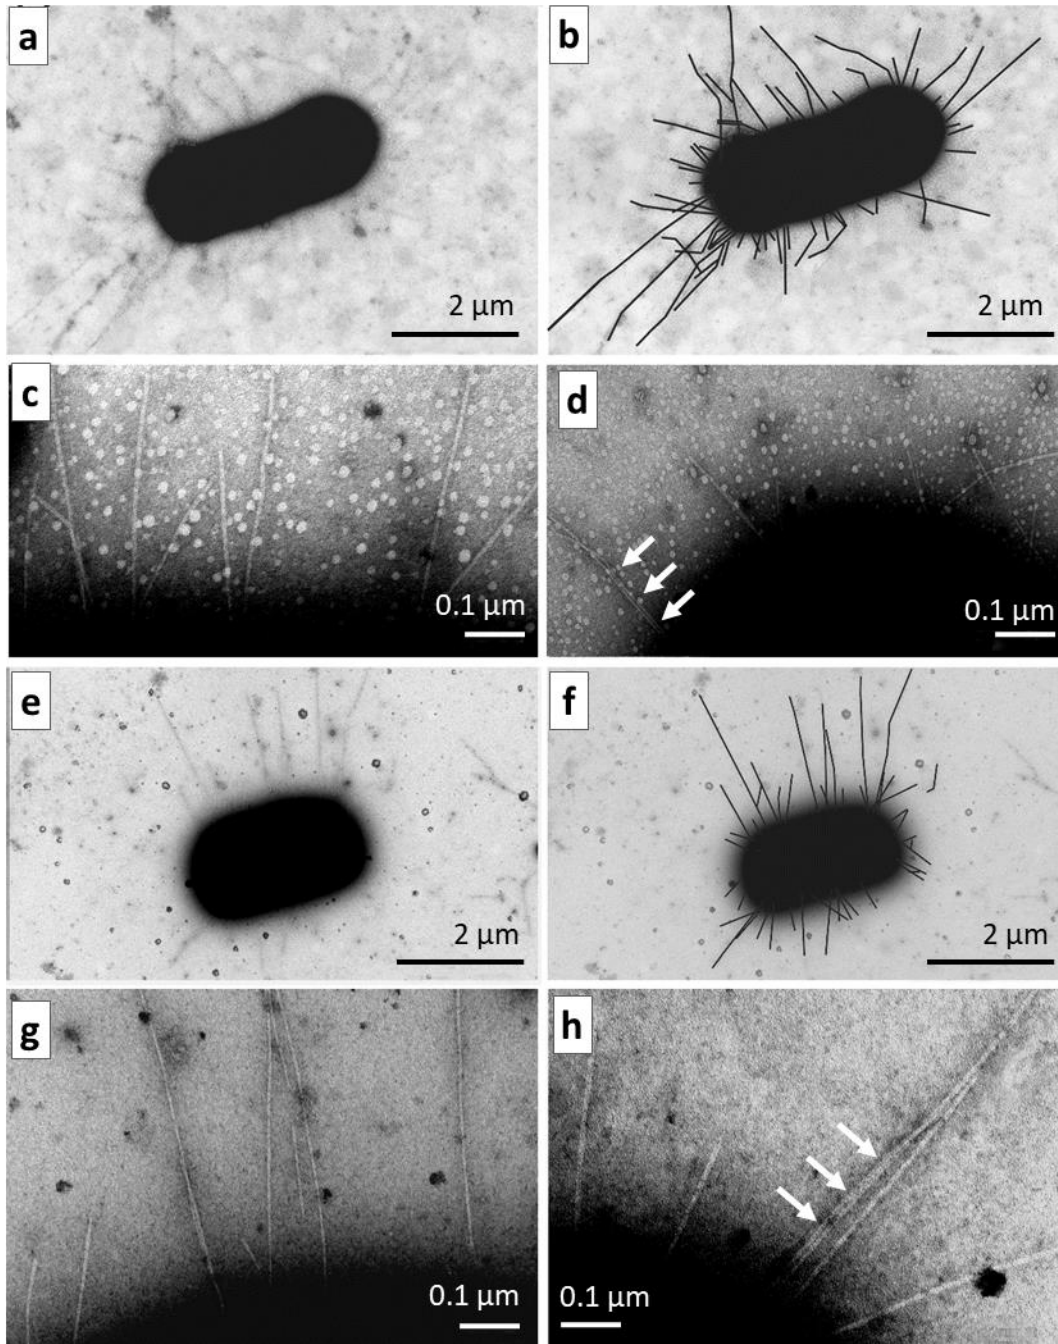

**Supplementary Figure S3.** View of *E. coli* cells with type 1 pili in a control sample. (a, e) Snapshots of two bacterial cells at low magnification. (b, f) Copies of the above snapshots with pili indicated by the black color. (c, d) Pili in magnified parts of panel a; in panel d, light arrows point to a two-pilus bundle. (g-h) Pili in magnified parts of panel e; in panel h, the black arrows indicate two-pilus bundles. The scale bar in panels a, b, e, and f is 2  $\mu\text{m}$ , and in panels c, d, g, and h is 0.1  $\mu\text{m}$ .

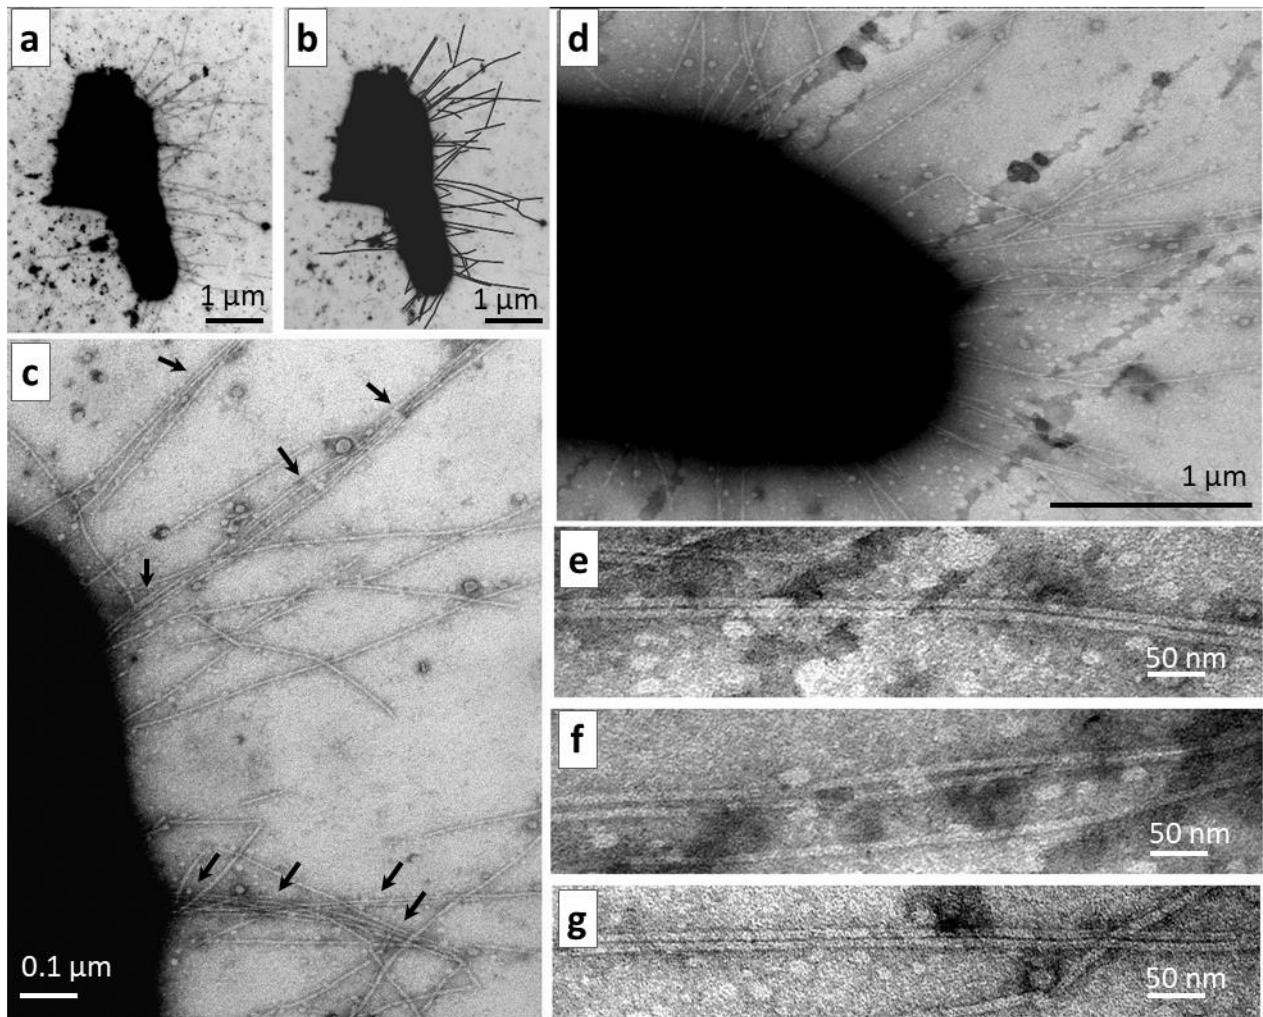

**Supplementary Figure S4.** Specific features of bundling of type 1 pili on *E. coli* cells after the THz irradiation. **(a)** Two aggregated bacterial cells, one of which carries numerous type 1 pili. **(b)** The copy of panel a in which pili are indicated with the black color. **(c, d)** Magnified part of panel a. Two-pilus bundles (indicated by arrows) are seen both near the surface of the outer membrane of a bacterium and at various distances from it. **(e–g)** Examples of two-pilus bundles. The scale bar is 1 μm in panels a, b, and d; 0.1 μm in c; and 50 nm in panels e–g.
